# Supplementary material for: Bioaccessibility of polymethoxyflavones encapsulated in resistant starch particle stabilized Pickering emulsions: role of fatty acid complexation and heat treatment
Source: Royal Society of Chemistry journal article supplement (doi:10.1039/c9fo01541h), 2019-01-01
Supplement: c9fo01541h1.pdf [file c9fo01541h1.pdf]

### Supplementary Information

#### Bioaccessibility of polymethoxyflavones encapsulated in resistant starch particles stabilized Pickering emulsions: Role of fatty acid complexation and heat treatment

Xuanxuan Lu, Qingrong Huang\*

**Table S1.** Ratio of precipitated complexes particles at the bottom of the vials.

| Sample <sup>a</sup> | RP (%) |
|---------------------|--------|
| Method I-C12:0      | 19.7   |
| Method I-C14:0      | 5.3    |
| Method I-C16:0      | 6.4    |
| Method I-C18:0      | 1.7    |
| Method I-C18:1      | -      |
| Method II-C12:0     | 2.1    |
| Method II-C14:0     | 1.3    |
| Method II-C16:0     | 0.2    |
| Method II-C18:0     | -      |
| Method II-C18:1     | -      |

<sup>a</sup> ‘-’ represents the amount of precipitated complexes particles was not detectable in the samples.
